# Supplementary material for: Facies architecture of Miocene subaqueous clinothems of the New Jersey passive margin: Results from IODP-ICDP Expedition 313
Source: Oxford University Press journal article supplement (doi:10.1130/ges01545.1), 2018-06-14

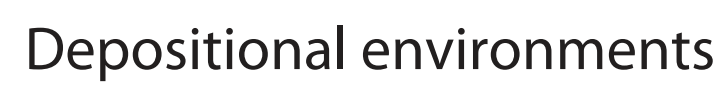

|        |                                   |
|--------|-----------------------------------|
| FA6    | Transgressive lag                 |
| FA5    | Gullies and clinoform-edge fans   |
| FA4.2  | Upper shoreface (G1)              |
| FA4.1  | Upper shoreface (Qz)              |
| FA3.2  | Lower shoreface (G1)              |
| FA3.1  | Lower shoreface (Qz)              |
| FA2.2  | Amalgamated toe of slope debrites |
| FA2.1b | Slope apron (top)                 |
| FA2.1a | Slope apron (base)                |
| FA1.2  | Upper offshore                    |
| FA1.1  | Lower offshore                    |

- Set 4** Lowstand ST
- Set 3** Falling Stage ST
- Set 2** Highstand ST
- Set 1** Transgressive ST

- ← **m5.32** Seismic surfaces (this study)
- ← *m5.32* Seismic surfaces (Miller et al., 2013)
- ← *m5.32* Seismic surfaces (Kominz et al., 2016)

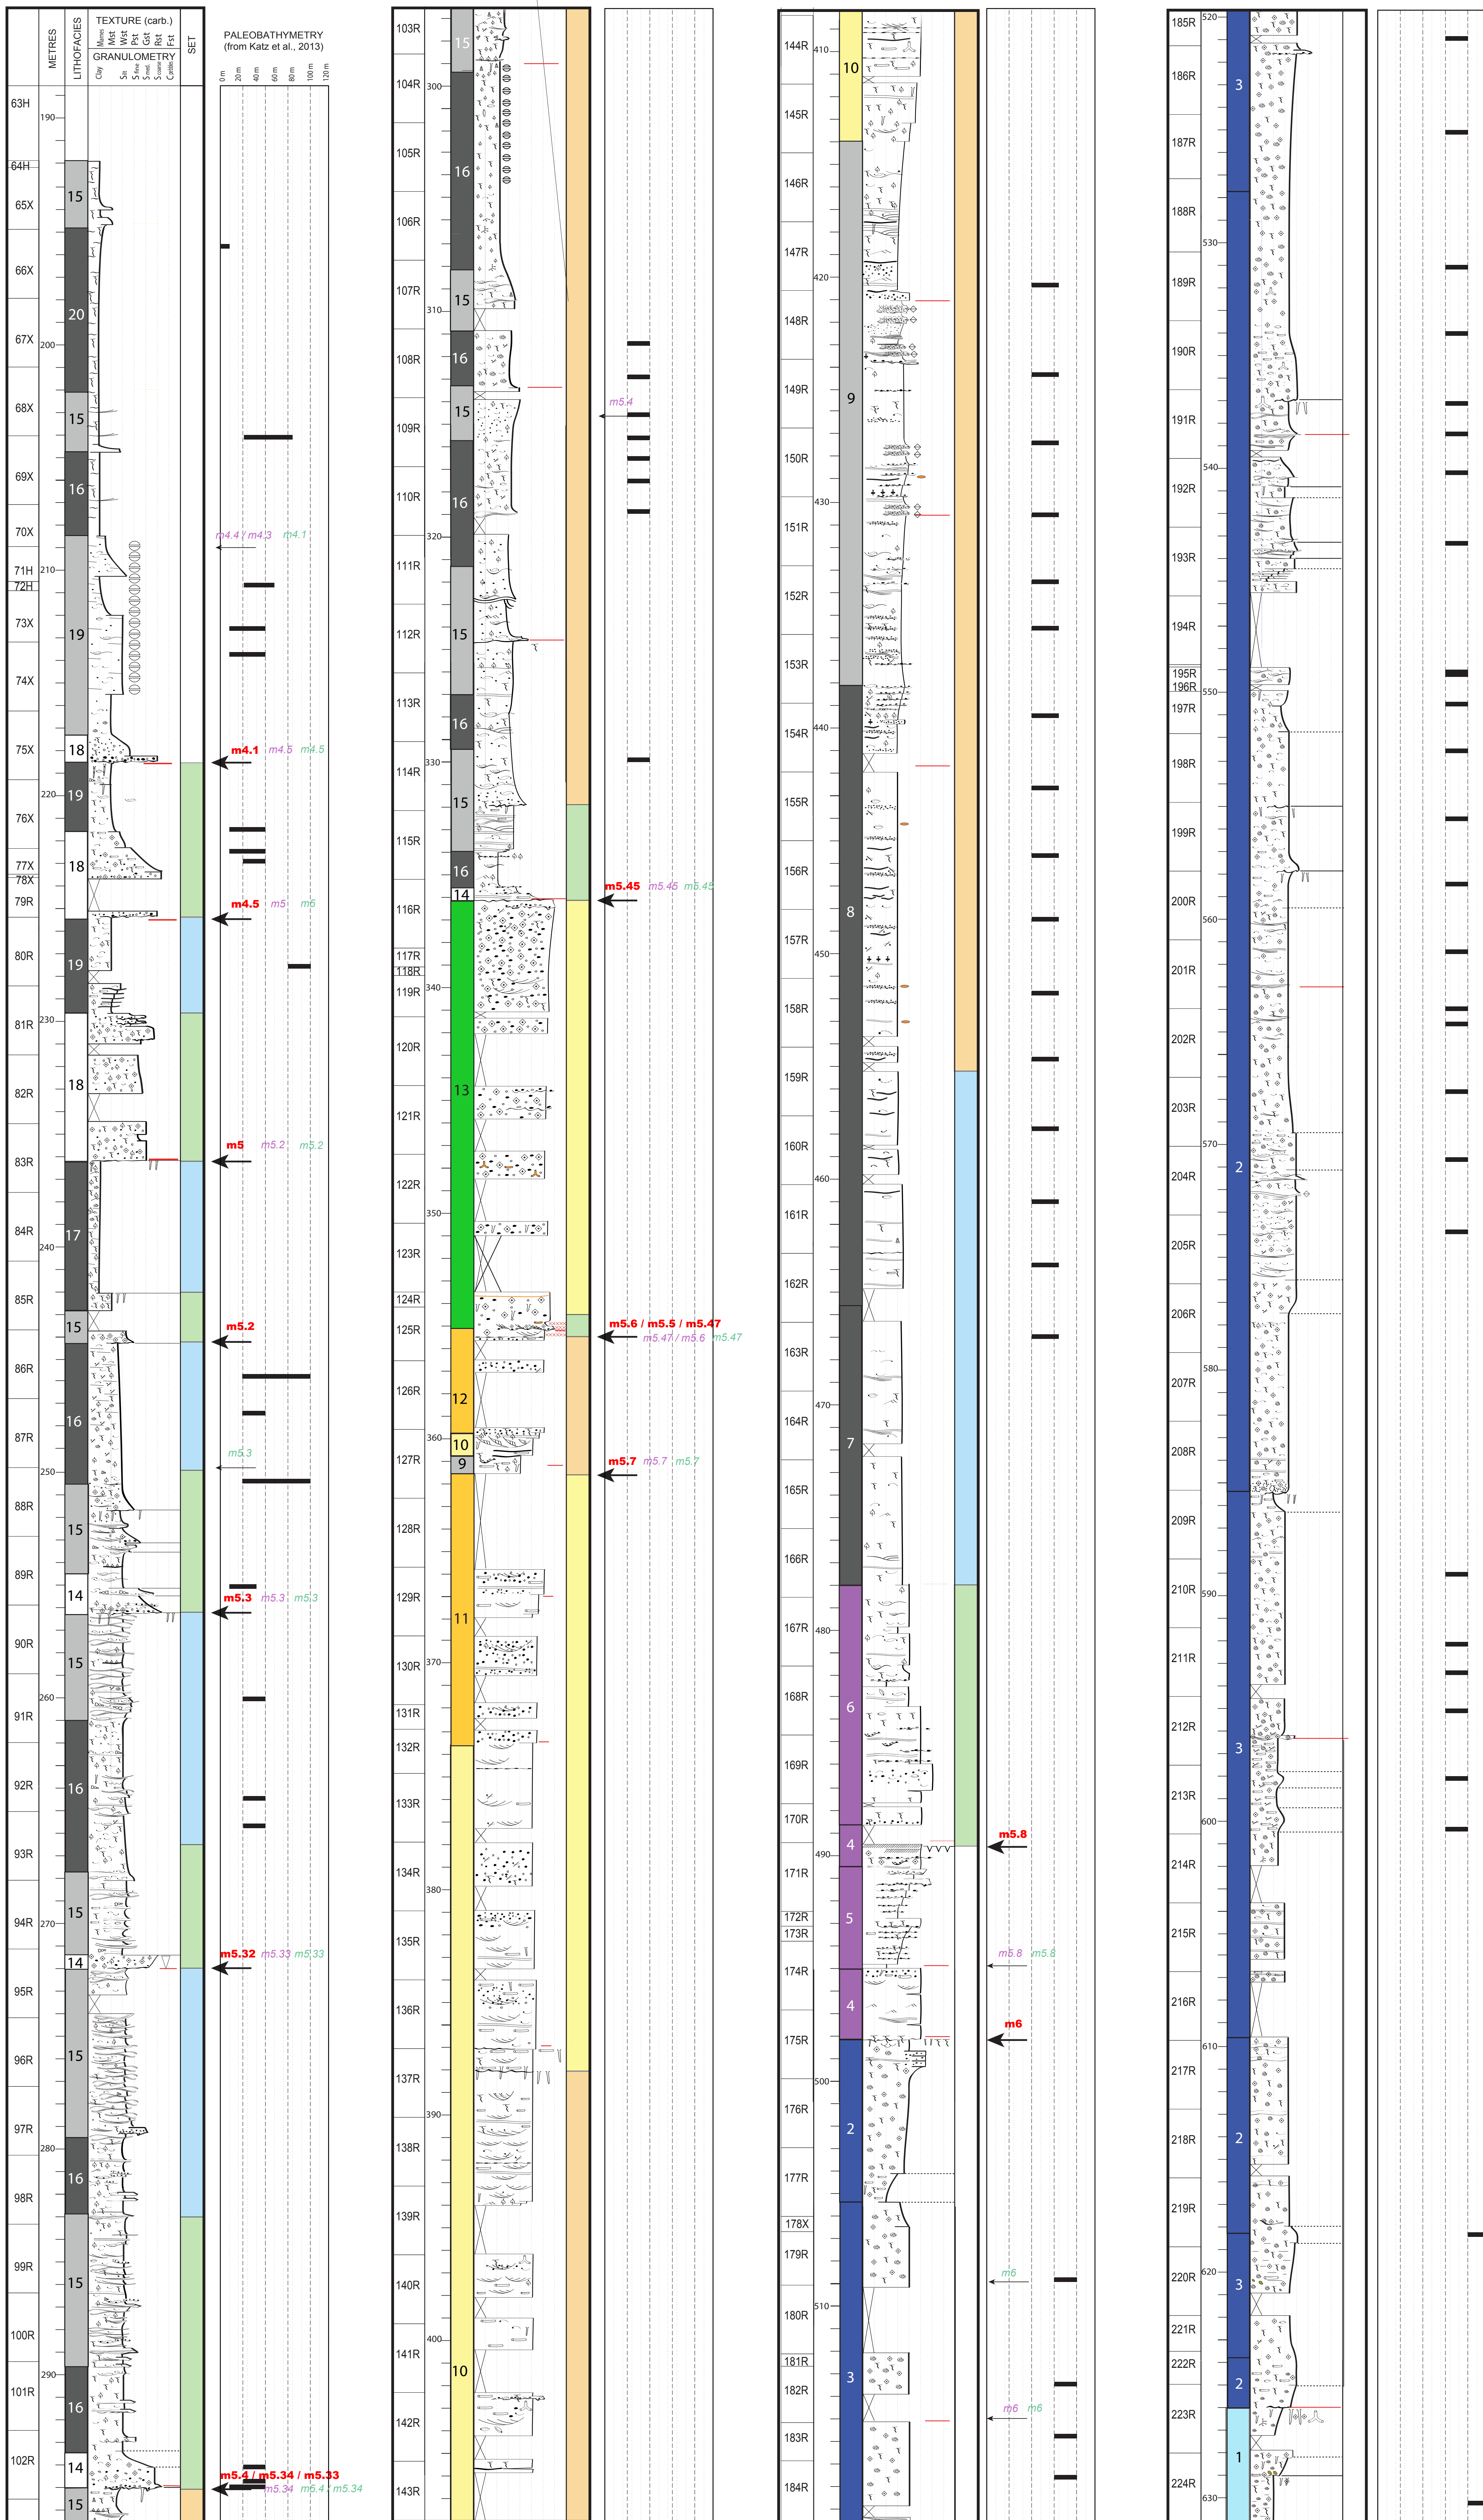

Supplement: ges01545_suppfiles.zip [file ges01545_suppfiles.zip]
