# Supplementary figures and images for: Facies architecture of Miocene subaqueous clinothems of the New Jersey passive margin: Results from IODP-ICDP Expedition 313
Source: Oxford University Press journal article supplement (doi:10.1130/ges01545.1), 2018-06-14

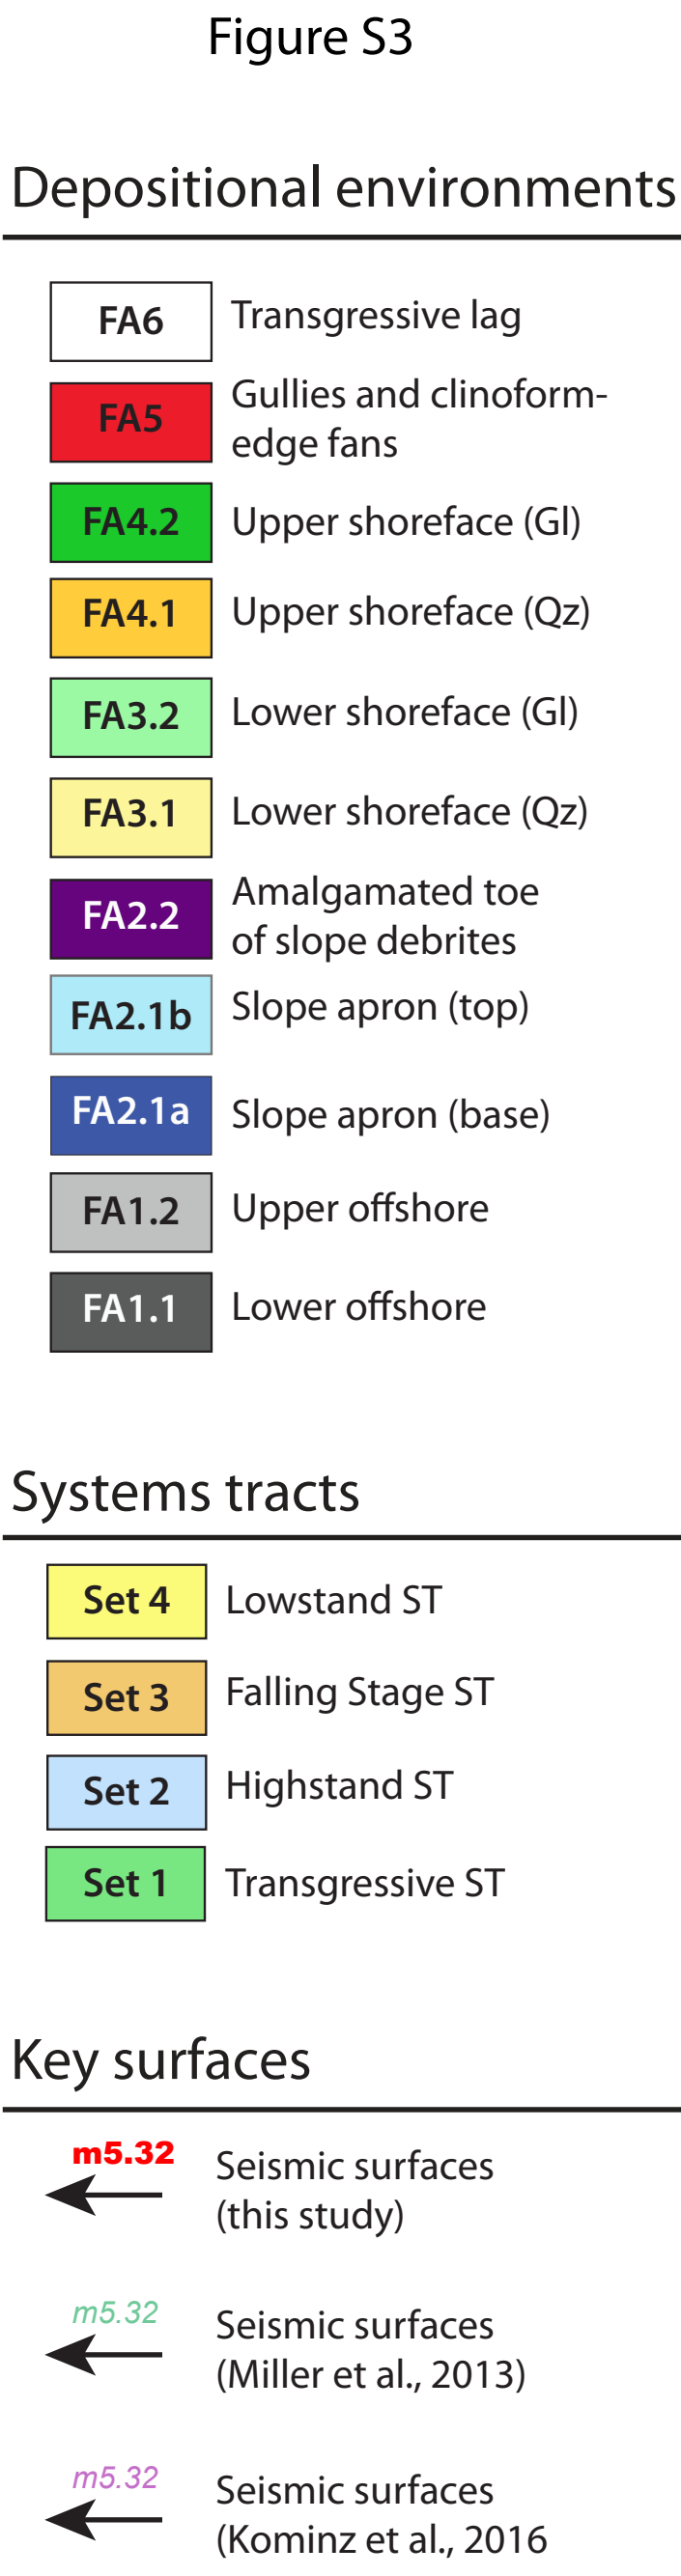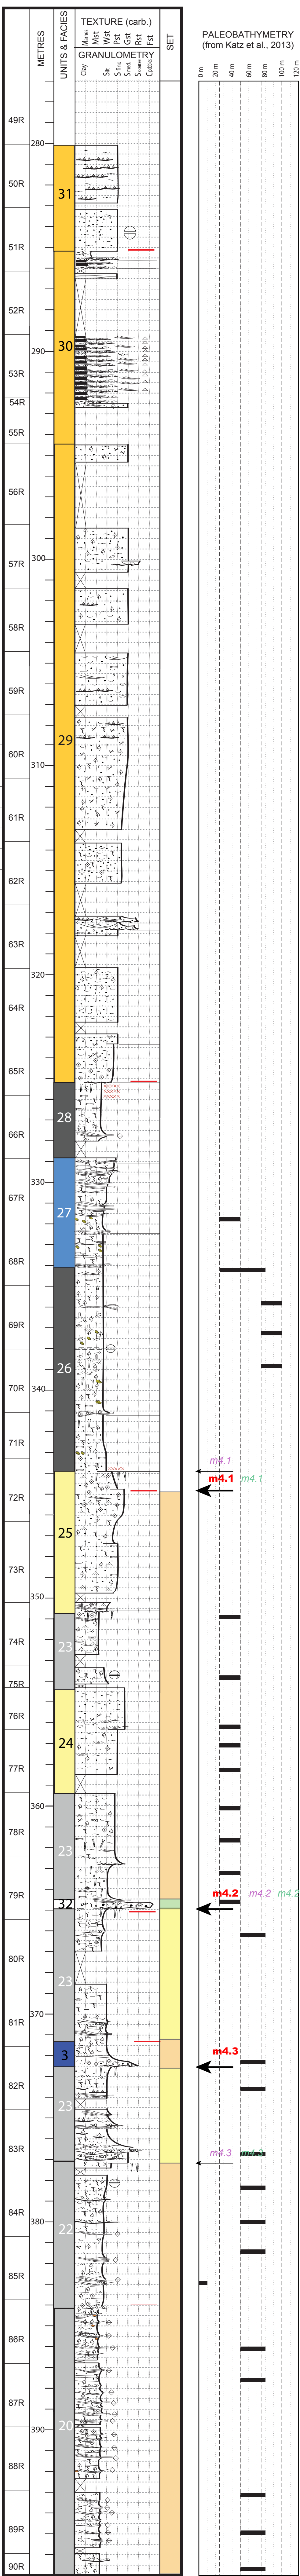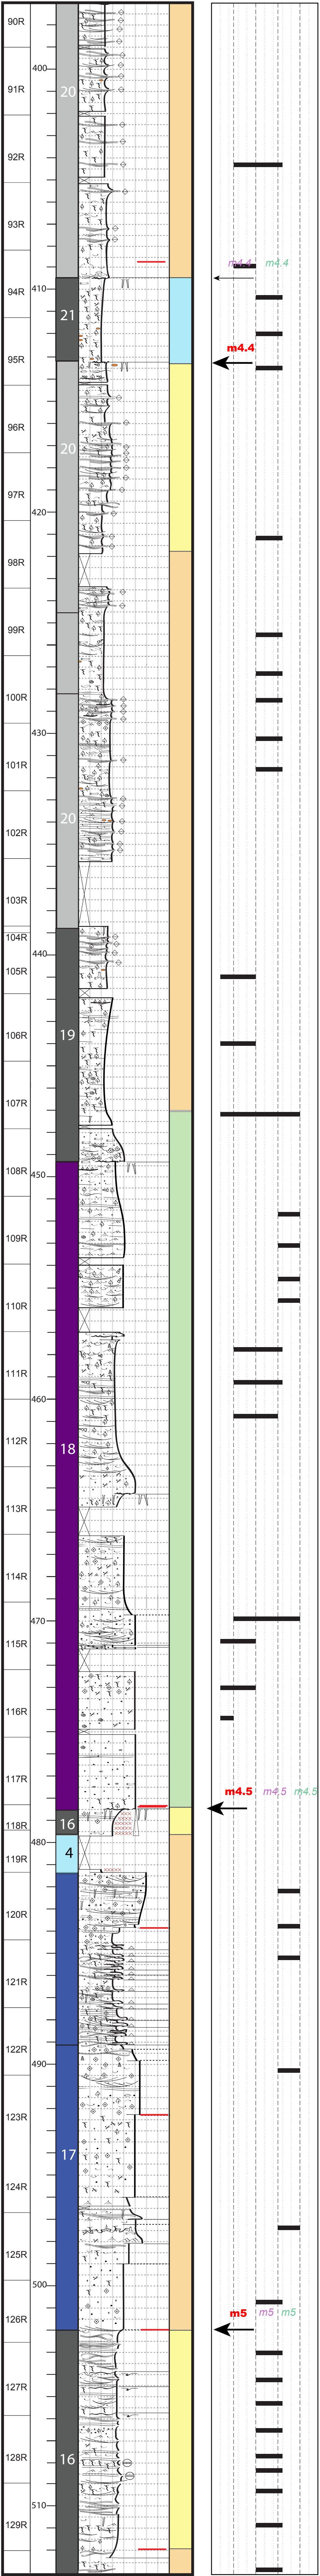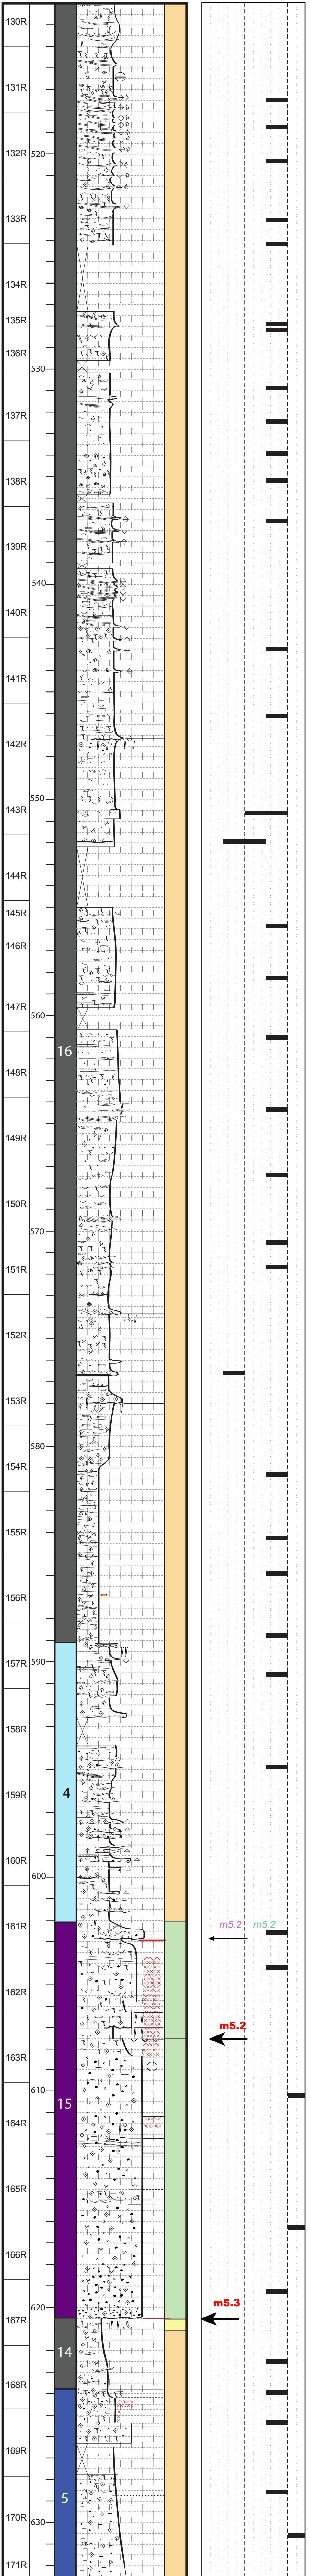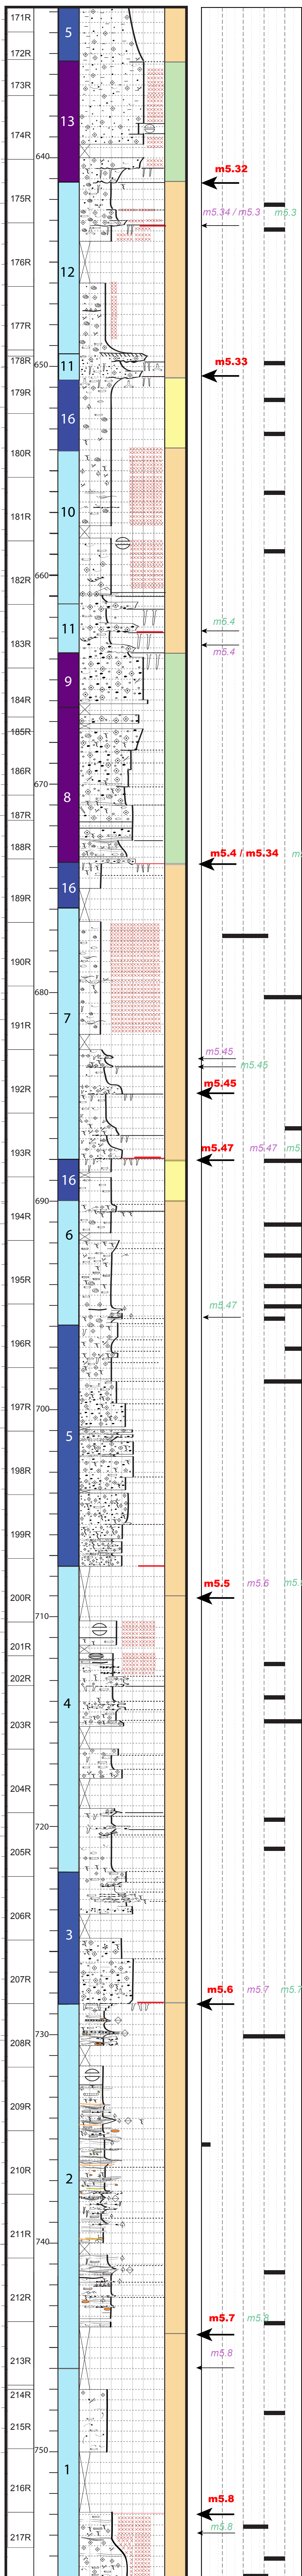

Supplement: ges01545_suppfiles.zip [file ges01545_suppfiles.zip]
